# Supplementary material for: Hepatitis B virus–specific T cells associate with viral control upon nucleos(t)ide-analogue therapy discontinuation
Source: JCI journal article supplement (doi:10.1172/jci92812), 2018-01-07
Supplement: sd2 [file 2]

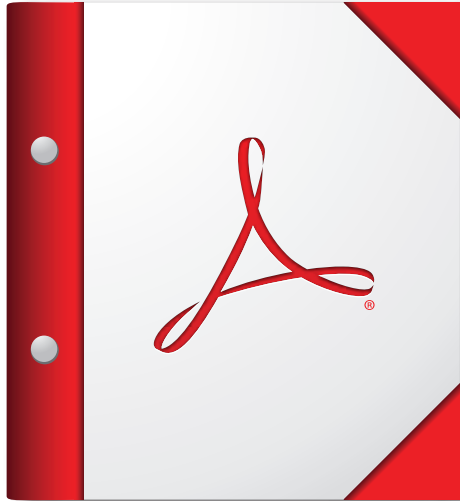

**For the best experience, open this PDF portfolio in  
Acrobat X or Adobe Reader X, or later.**

[Get Adobe Reader Now!](#)
